# Supplementary material
Source: publisher figshare collection journal article supplement (https://sage.figshare.com/ndownloader/files/15316640)
Supplement: Supplementary file [file 15316640]

## Supplement 1

### Survey questions

#### Q1 Positive rating of online patient feedback

In the grid below, please indicate your level of agreement with each statement.

*Please select one response per statement*

|                                                                                                                                                                                     | Strongly disagree     | Somewhat disagree     | Neither agree nor disagree | Somewhat agree        | Strongly agree        |
|-------------------------------------------------------------------------------------------------------------------------------------------------------------------------------------|-----------------------|-----------------------|----------------------------|-----------------------|-----------------------|
| Online patient feedback on experiences of NHS care which is captured on internet reviews and ratings sites is <b>useful to help the NHS improve services</b>                        | <input type="radio"/> | <input type="radio"/> | <input type="radio"/>      | <input type="radio"/> | <input type="radio"/> |
| Online patient feedback in social media (such as in Tweets on Twitter or in posts on Facebook or a discussion forum like Mumsnet) is <b>useful to help the NHS improve services</b> | <input type="radio"/> | <input type="radio"/> | <input type="radio"/>      | <input type="radio"/> | <input type="radio"/> |

#### Q2 Negative rating of online patient feedback

In the grid below, please indicate your level of agreement with each statement.

*Please select one response per statement*

To what extent do you agree with the following statements?

|                                                                                                                                                                | Strongly disagree     | Somewhat disagree     | Neither agree nor disagree | Somewhat agree        | Strongly agree        |
|----------------------------------------------------------------------------------------------------------------------------------------------------------------|-----------------------|-----------------------|----------------------------|-----------------------|-----------------------|
| Online patient feedback on experiences of NHS care which is captured on internet reviews and ratings sites is <b>generally negative</b>                        | <input type="radio"/> | <input type="radio"/> | <input type="radio"/>      | <input type="radio"/> | <input type="radio"/> |
| Online patient feedback in social media (such as in Tweets on Twitter or in posts on Facebook or a discussion forum like Mumsnet) is <b>generally negative</b> | <input type="radio"/> | <input type="radio"/> | <input type="radio"/>      | <input type="radio"/> | <input type="radio"/> |

### Q3 Usefulness of online patient feedback

In the grid below, please rate the frequency that applies to each statement.

*Please select one response per statement*

|                                                                                                       | Never                 | Rarely                | Sometimes             | More often than not   | All the time          |
|-------------------------------------------------------------------------------------------------------|-----------------------|-----------------------|-----------------------|-----------------------|-----------------------|
| You encourage your patients/their carers to leave feedback on internet reviews and ratings sites?     | <input type="radio"/> | <input type="radio"/> | <input type="radio"/> | <input type="radio"/> | <input type="radio"/> |
| Your organisation feedback internet reviews and comments left by patients/carers to you or your team? | <input type="radio"/> | <input type="radio"/> | <input type="radio"/> | <input type="radio"/> | <input type="radio"/> |
| You make a change to your practice because of feedback from internet reviews and ratings sites?       | <input type="radio"/> | <input type="radio"/> | <input type="radio"/> | <input type="radio"/> | <input type="radio"/> |

### Q4 Representation of patient views

How representative of patient views do you think online patient/carers feedback is?

*Please select one option*

- Very unrepresentative (1)
- Somewhat unrepresentative (2)
- Neither unrepresentative nor representative (3)
- Somewhat representative (4)
- Very representative (5)

### Q5 Ever left online feedback about care

Have patients/carers ever left online patient feedback on an internet review or ratings site about an episode of care in which you were involved?

- Yes (1)
- No (2)
- I don't know (3)

**Q6 Ever left online feedback about you**

Have patients/carers ever left online patient feedback on an internet review or ratings site about you as an individual practitioner?

Yes (1)

No (2)

I don't know (3)

**Table S1****Online patient feedback on experiences of NHS care is useful to help the NHS improve services**

|                                                      | Internet reviews and ratings |             |         | Social media |             |         |
|------------------------------------------------------|------------------------------|-------------|---------|--------------|-------------|---------|
| Predictor variables                                  | OR                           | 95% CI      | P value | OR           | 95% CI      | P value |
| Health professional type (doctor vs nurse*)          | 0.101                        | 0.070-0.146 | 0.000   | 0.162        | 0.119-0.220 | <0.001  |
| Health professional setting (community vs hospital*) | 0.315                        | 0.242-0.410 | 0.000   | 0.448        | 0.351-0.572 | <0.001  |
| Gender (male vs female*)                             | 1.057                        | 0.783-1.426 | 0.718   | 1.018        | 0.760-1.364 | 0.904   |
| Age                                                  |                              |             |         |              |             |         |
| • Under 30                                           | 1.049                        | 0.341-3.232 | 0.933   | 1.112        | 0.507-2.440 | 0.791   |
| • 30-39                                              | 0.691                        | 0.390-1.223 | 0.205   | 1.042        | 0.617-1.758 | 0.879   |
| • 40-49                                              | 0.770                        | 0.439-1.350 | 0.362   | 1.041        | 0.624-1.738 | 0.877   |
| • 50-59                                              | 0.635                        | 0.360-1.121 | 0.117   | 0.988        | 0.591-1.653 | 0.964   |
| • 60+*                                               |                              |             |         |              |             |         |

\*Reference category

**Table S2:****Online patient feedback on experiences of NHS care is generally negative doctors and nurses**

| Predictor variables                                  | Internet reviews and ratings |             |       | Social media |             |        |
|------------------------------------------------------|------------------------------|-------------|-------|--------------|-------------|--------|
|                                                      | OR                           | 95% CI      | P     | OR           | 95% CI      | P      |
| Health professional type (doctor vs nurse*)          | 1.887                        | 1.324-2.689 | 0.000 | 3.645        | 2.463-5.394 | <0.001 |
| Health professional setting (community vs hospital*) | 2.835                        | 2.142-3.753 | 0.000 | 2.450        | 1.792-3.348 | <0.001 |
| Gender (male vs female*)                             | 1.040                        | 0.742-1.459 | 0.819 | 0.881        | 0.598-1.300 | 0.525  |
| Age                                                  |                              |             |       |              |             |        |
| • Under 30                                           | 1.263                        | 0.565-2.824 | 0.570 | 1.225        | 0.520-2.885 | 0.643  |
| • 30-39                                              | 1.568                        | 0.873-2.815 | 0.132 | 1.364        | 0.720-2.583 | 0.341  |
| • 40-49                                              | 1.457                        | 0.821-2.588 | 0.199 | 1.548        | 0.826-2.902 | 0.173  |
| • 50-59                                              | 1.513                        | 0.848-2.699 | 0.161 | 1.574        | 0.837-2.958 | 0.159  |
| • 60+*                                               |                              |             |       |              |             |        |

\*Reference category

**Table S3:****Behaviours in relation to online feedback on internet reviews and ratings sites.**

|                                                      | Encouraged patients/carers to leave feedback |             |       | Made a change to practice |             |        |
|------------------------------------------------------|----------------------------------------------|-------------|-------|---------------------------|-------------|--------|
| Predictor variables                                  | OR                                           | 95% CI      | P     | OR                        | 95% CI      | P      |
| Health professional type (doctor vs nurse*)          | 0.537                                        | 0.359-0.803 | 0.002 | 0.328                     | 0.229-0.470 | <0.001 |
| Health professional setting (community vs hospital*) | 0.559                                        | 0.405-0.771 | 0.000 | 0.550                     | 0.414-0.730 | <0.001 |
| Gender (male vs female*)                             | 1.073                                        | 0.719-1.601 | 0.731 | 0.837                     | 0.578-1.211 | 0.345  |
| Age                                                  |                                              |             |       |                           |             |        |
| • Under 30                                           | 0.957                                        | 0.407-2.025 | 0.921 | 1.125                     | 0.532-2.377 | 0.758  |
| • 30-39                                              | 0.745                                        | 0.384-1.445 | 0.384 | 0.811                     | 0.442-1.488 | 0.499  |
| • 40-49                                              | 0.900                                        | 0.480-1.688 | 0.742 | 0.917                     | 0.514-1.636 | 0.770  |
| • 50-59                                              | 1.032                                        | 0.556-1.916 | 0.921 | 1.283                     | 0.733-2.248 | 0.383  |
| • 60+*                                               |                                              |             |       |                           |             |        |

\*Reference category
